# Supplementary material
Source: PubMed Central journal article supplement (PMC4187854)
Supplement: IAI.01685-14_zii999090873so1.pdf [file IAI.01685-14_zii999090873so1.pdf]

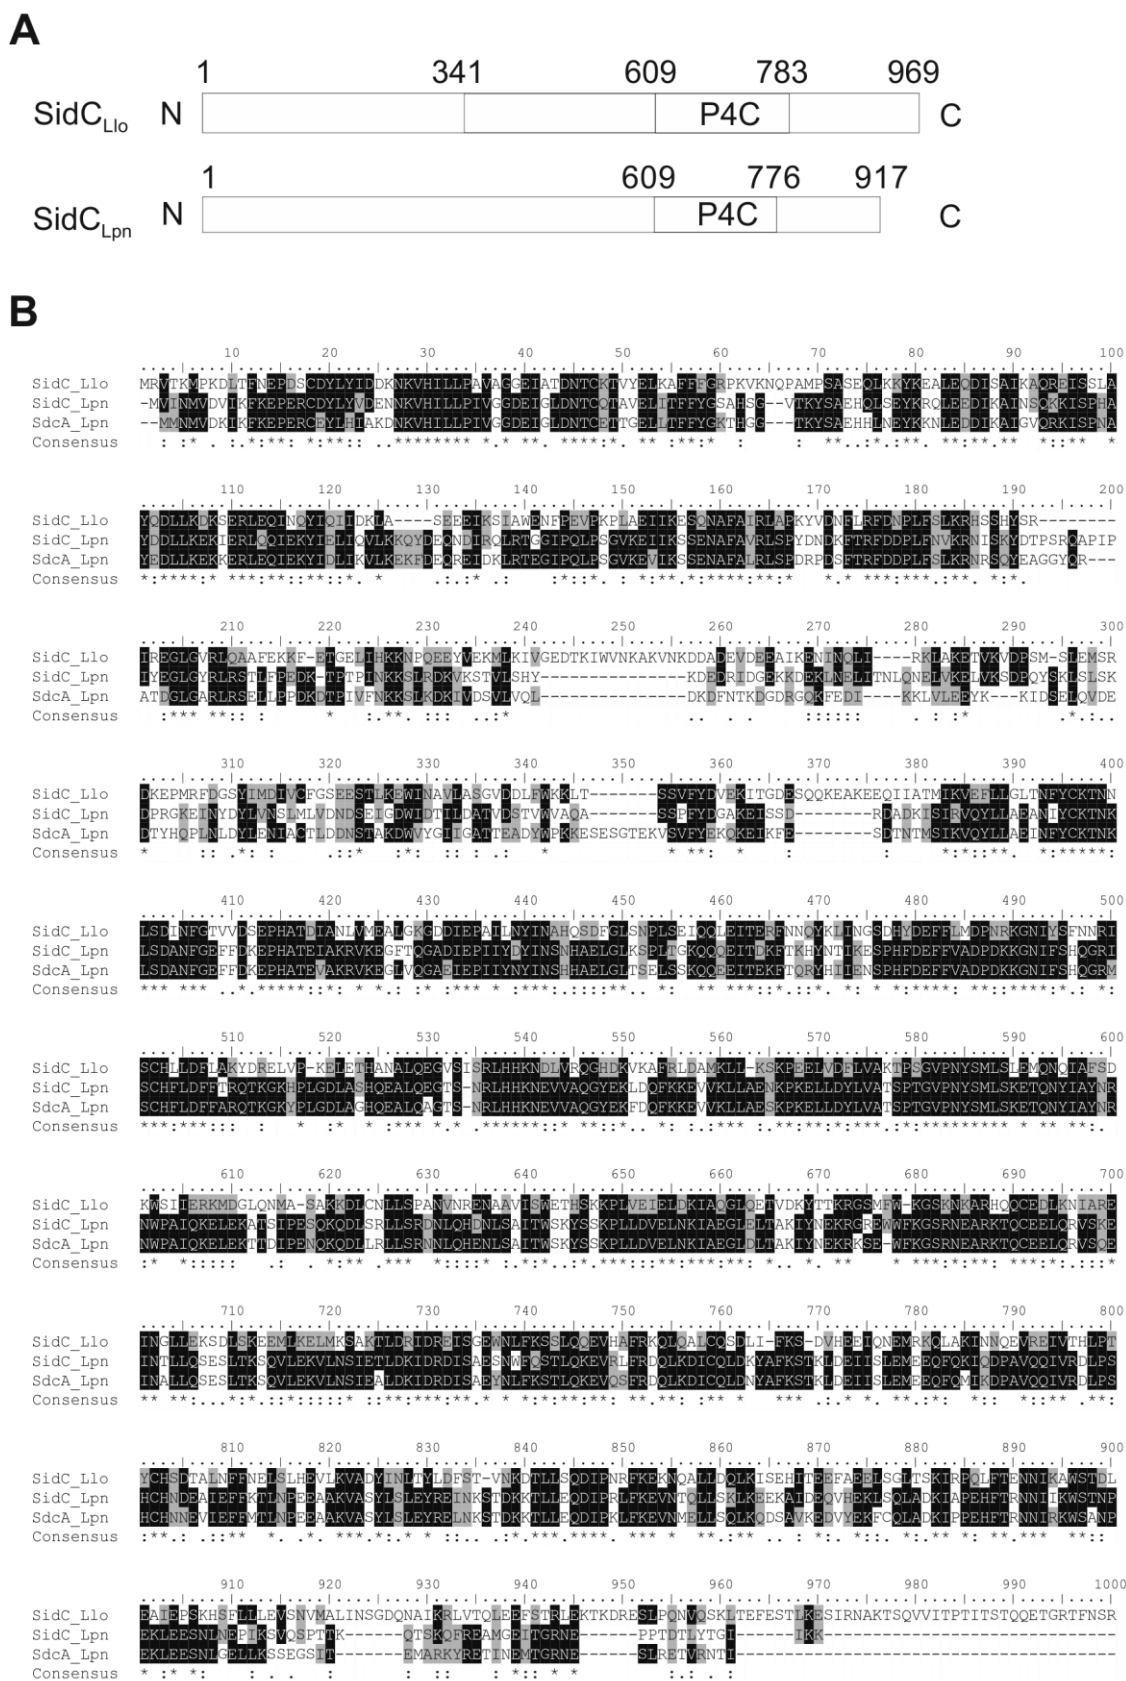

**FIG S1** Alignment of SidC<sub>Llo</sub>, SidC<sub>Lpn</sub> and SdcA<sub>Lpn</sub>. (A) Domain analysis of 111 kDa SidC<sub>Llo</sub> and 106 kDa SidC<sub>Lpn</sub>. (B) Amino acid sequence alignment of SidC<sub>Llo</sub>, SidC<sub>Lpn</sub> and SdcA<sub>Lpn</sub> using the Clustal Omega algorithm. Full-length SidC<sub>Llo</sub>/SidC<sub>Lpn</sub> or the corresponding P4C domains share 40% or 45% identity, respectively. Identical or similar amino acids are marked in black or in gray.

**TABLE S1.** Bacterial strains and plasmids.

| Strain/plasmid           | Properties                                                              | Reference  |
|--------------------------|-------------------------------------------------------------------------|------------|
| <i>E. coli</i>           |                                                                         |            |
| BL21(DE3)                |                                                                         | Novagen    |
| TOP10                    |                                                                         | Invitrogen |
| ST18                     | S17 $\lambda$ pir $\Delta$ hemA                                         | (1)        |
| <i>L. longbeachae</i>    |                                                                         |            |
| NSW150                   | <i>L. longbeachae</i> strain NSW150, serogroup 1                        | (2)        |
| $\Delta$ dotA            | NSW150 dotA::Kan <sup>R</sup> ( $\Delta$ dotA)                          | (2)        |
| IH02                     | NSW150 llo3098::Kan <sup>R</sup> ( $\Delta$ sidC)                       | This study |
| <i>L. pneumophila</i>    |                                                                         |            |
| JR32                     | <i>L. pneumophila</i> strain Philadelphia-1, serogroup 1                | (3)        |
| LELA3118                 | JR32 dotA3118::Kan <sup>R</sup> ( $\Delta$ dotA)                        | (3)        |
| GS3011                   | JR32 icmT3011::Kan <sup>R</sup> ( $\Delta$ icmT)                        | (4)        |
| CR01                     | JR32 sidC-sdcA::Kan <sup>R</sup> ( $\Delta$ sidC-sdcA)                  | (5)        |
| Plasmids                 |                                                                         |            |
| pET28a(+)                | N-terminal His <sub>6</sub> -fusion, P <sub>T7</sub> , Kan <sup>R</sup> | Novagen    |
| pGEX4T-1                 | N-terminal GST-fusion, P <sub>tac</sub> , Amp <sup>R</sup>              | Amersham   |
| pMMB207-C-M45            | pMMB207-C, $\Delta$ mobC, M45-(Gly) <sub>5</sub> , Cam <sup>R</sup>     | (6)        |
| pCaln-GFP                | P <sub>act15</sub> , calnexinA-RSSSKLK-GFP (S65T), G418                 | (7)        |
| pCR01                    | pET28a(+), His <sub>6</sub> -sidC <sub>Lpn</sub> (P <sub>tac</sub> )    | (6)        |
| pCR02                    | pGEX4T-1, GST-sidC <sub>Lpn</sub> (P <sub>tac</sub> )                   | (6)        |
| pCR34                    | pMMB207-C, M45-sidC <sub>Lpn</sub> (P <sub>tac</sub> )                  | (6)        |
| pCR77                    | pMMB207-C-P <sub>tac</sub> -RBS-dsred-RBS                               | (8)        |
| pCR80                    | pMMB207-C-P <sub>tac</sub> -RBS-dsred-RBS-sidC <sub>Lpn</sub>           | (8)        |
| pGEX-PH <sub>FAPP1</sub> | pGEX4T-1, GST-PH <sub>FAPP1</sub> (P <sub>tac</sub> )                   | (9, 10)    |

|         |                                                                                                                                                   |            |
|---------|---------------------------------------------------------------------------------------------------------------------------------------------------|------------|
| pHP56   | pGEX4T-1, <i>GST-sidC</i> <sub>Lpn_609-776</sub> ( <i>P</i> <sub>tac</sub> )                                                                      | (5)        |
| pIH33   | pLAW344-upstream <i>sidC</i> <sub>Llo</sub> '-Kan <sup>R</sup> -downstream <i>sidC</i> <sub>Llo</sub> '                                           | This study |
| pIH47   | pMMB207-C- <i>P</i> <sub>tac</sub> -RBS- <i>dsred</i> -RBS- <i>sdca</i> <sub>Lpn</sub>                                                            | This study |
| pIH60   | pGEX4T-1, <i>GST-sidC</i> <sub>Lpn_1-608-Llo_609-969</sub>                                                                                        | This study |
| pLAW344 | <i>oriT</i> (RK2), <i>oriR</i> (ColE1), <i>sacB</i> , Cam <sup>R</sup> , Amp <sup>R</sup>                                                         | (11)       |
| pMH01   | pGEX4T-1, <i>GST-sidC</i> <sub>Llo_1-608-Lpn_609-917</sub>                                                                                        | This study |
| pSD01   | pET28a(+); <i>His</i> <sub>6</sub> - <i>sidC</i> <sub>Llo</sub> ( <i>P</i> <sub>T7</sub> )                                                        | This study |
| pSD02   | pET28a(+); <i>His</i> <sub>6</sub> - <i>sidC</i> <sub>Llo</sub> ( <i>P</i> <sub>T7</sub> ),<br><i>Bam</i> HI/ <i>Sal</i> I deleted in <i>sidC</i> | This study |
| pSD03   | pGEX4T-1, <i>GST-sidC</i> <sub>Llo_609-782</sub> ( <i>P</i> <sub>tac</sub> )                                                                      | This study |
| pSD04   | pGEX4T-1, <i>GST-sidC</i> <sub>Llo_1-340</sub> ( <i>P</i> <sub>tac</sub> )                                                                        | This study |
| pSD05   | pGEX4T-1, <i>GST-sidC</i> <sub>Llo_341-608</sub> ( <i>P</i> <sub>tac</sub> )                                                                      | This study |
| pSD06   | pGEX4T-1, <i>GST-sidC</i> <sub>Llo_783-969</sub> ( <i>P</i> <sub>tac</sub> )                                                                      | This study |
| pSD07   | pGEX4T-1, <i>GST-sidC</i> <sub>Llo</sub> ( <i>P</i> <sub>tac</sub> )                                                                              | This study |
| pSD13   | pMMB207-C, <i>M45-sidC</i> <sub>Llo</sub> ( <i>P</i> <sub>tac</sub> )                                                                             | This study |
| pSD14   | pMMB207-C- <i>P</i> <sub>tac</sub> -RBS- <i>dsred</i> -RBS- <i>sidC</i> <sub>Llo</sub>                                                            | This study |
| pSW001  | pMMB207-C, $\Delta$ <i>lacI</i> <sup>fl</sup> , constitutive <i>dsred</i>                                                                         | (12)       |
| pUC4K   | <i>oriR</i> (pBR322), Amp <sup>R</sup> , MCS::Kan <sup>R</sup>                                                                                    | Amersham   |

---

Abbreviations: ampicillin (Amp); chloramphenicol (Cam); kanamycin (Kan); geneticin (G418)

## REFERENCES

1. **Thoma S, Schobert M.** 2009. An improved *Escherichia coli* donor strain for diparental mating. *FEMS Microbiol Lett* **294**:127-132.
2. **Cazalet C, Gomez-Valero L, Rusniok C, Lomma M, Dervins-Ravault D, Newton HJ, Sansom FM, Jarraud S, Zidane N, Ma L, Bouchier C, Etienne J, Hartland EL, Buchrieser C.** 2010. Analysis of the *Legionella longbeachae* genome and transcriptome uncovers unique strategies to cause Legionnaires' disease. *PLoS Genetics* **6**:e1000851.

3. **Sadosky AB, Wiater LA, Shuman HA.** 1993. Identification of *Legionella pneumophila* genes required for growth within and killing of human macrophages. *Infect Immun* **61**:5361-5373.
4. **Segal G, Shuman HA.** 1998. Intracellular multiplication and human macrophage killing by *Legionella pneumophila* are inhibited by conjugal components of IncQ plasmid RSF1010. *Mol Microbiol* **30**:197-208.
5. **Ragaz C, Pietsch H, Urwyler S, Tiaden A, Weber SS, Hilbi H.** 2008. The *Legionella pneumophila* phosphatidylinositol-4 phosphate-binding type IV substrate SidC recruits endoplasmic reticulum vesicles to a replication-permissive vacuole. *Cell Microbiol* **10**:2416-2433.
6. **Weber SS, Ragaz C, Reus K, Nyfeler Y, Hilbi H.** 2006. *Legionella pneumophila* exploits PI(4)P to anchor secreted effector proteins to the replicative vacuole. *PLoS Pathog* **2**:e46.
7. **Müller-Taubenberger A, Lupas AN, Li H, Ecke M, Simmeth E, Gerisch G.** 2001. Calreticulin and calnexin in the endoplasmic reticulum are important for phagocytosis. *EMBO J* **20**:6772-6782.
8. **Finsel I, Ragaz C, Hoffmann C, Harrison CF, Weber S, van Rahden VA, Johannes L, Hilbi H.** 2013. The *Legionella* effector RidL inhibits retrograde trafficking to promote intracellular replication. *Cell Host Microbe* **14**:38-50.
9. **Dowler S, Kular G, Alessi DR.** 2002. Protein lipid overlay assay. *Sci STKE* **2002**:PL6.
10. **Godi A, Di Campli A, Konstantakopoulos A, Di Tullio G, Alessi DR, Kular GS, Daniele T, Marra P, Lucocq JM, De Matteis MA.** 2004. FAPPs control Golgi-to-cell-surface membrane traffic by binding to ARF and PtdIns(4)P. *Nat Cell Biol* **6**:393-404.
11. **Wiater LA, Sadosky AB, Shuman HA.** 1994. Mutagenesis of *Legionella pneumophila* using Tn903dIIIacZ: identification of a growth-phase-regulated pigmentation gene. *Mol Microbiol* **11**:641-653.
12. **Mampel J, Spirig T, Weber SS, Haagensen JAJ, Molin S, Hilbi H.** 2006. Planktonic replication is essential for biofilm formation by *Legionella pneumophila* in a complex medium under static and dynamic flow conditions. *Appl Environ Microbiol* **72**:2885-2895.

**TABLE S2.** Oligonucleotides used in this study.

| Oligo | Sequence (5' - 3') <sup>a</sup>                 | Comments                                                                 |
|-------|-------------------------------------------------|--------------------------------------------------------------------------|
| oCR1  | AAAAACGCGGATCCATGGTGATAAACATGGTTGACG            | 5' of <i>sidC</i> , <i>Bam</i> HI (Ref. 5)                               |
| oIH19 | AAAAACGCTCTAGATCCTCTACTACCTTGTGAGT              | 5' upstr. <i>sidC</i> <sub>Llo</sub> (fo), <i>Xba</i> I                  |
| oIH20 | AAAAACGCGGATCCGAAACATTAAGAAGTGTGCG              | 3' upstream <i>sidC</i> <sub>Llo</sub> (re)                              |
| oIH21 | AAAAACGCGGATCCATCTGAATGAAGCAAATTG               | 5' downstream <i>sidC</i> <sub>Llo</sub> (fo)                            |
| oIH22 | AAAAACGCTCTAGAAATTTACTGACTTGCAATCA              | 3' downstream <i>sidC</i> <sub>Llo</sub> (re)                            |
| oIH23 | ATCCAAACCATCGTCGTGTC                            | 5' upstream oIH019 (fo)                                                  |
| oIH24 | ATCCTGAGGAGTTGCAGAAAG                           | 3' downstream oIH022 (re)                                                |
| oIH39 | AAAAACGCCTGCAGCTGACCAGGTAATTGC                  | 3' of <i>sidC</i> <sub>Lpn1-608</sub> (re), <i>Pst</i> I                 |
| oIH40 | AAAAACGCCTGCAGTTATTTCTGGGAAAC                   | 5' of <i>sidC</i> <sub>Llo609-969</sub> (fo), <i>Pst</i> I               |
| oMH01 | GGATCCACGCGGAACCAGATCCGATTTTGG                  | pGEX-4T-1 (re)                                                           |
| oMH02 | CCGGAATTCCCGGGTTCGACTCGAGCGGCCG                 | pGEX-4T-1 (fo)                                                           |
| oMH03 | gttccgctggatccATGAGAGTCACTAAAATGCC              | 5' of <i>sidC</i> <sub>Llo1-608</sub> (fo)                               |
| oMH04 | aggaatatttATTTTCTTATTCACGTTTGC                  | 3' of <i>sidC</i> <sub>Llo1-608</sub> (re)                               |
| oMH05 | tagagaaaatAAATATTCCTCCAAGCCATTATTG              | 5' of <i>sidC</i> <sub>Lpn609-917</sub> (fo)                             |
| oMH06 | accggaattccggCTATTTCTTTATAATTCCCGTGTAC          | 3' of <i>sidC</i> <sub>Lpn609-917</sub> (re)                             |
| oSD05 | TTTTGGGATCCGAATATAGAGAACTAAAATG                 | 5' flanking sequence <i>sidC</i> <sub>Llo</sub><br>(fo), <i>Bam</i> HI   |
| oSD06 | TTTTTGTCGACGAAATAAAGTTAAGTACGTGAATTA<br>AGTACG  | 3' flanking sequence <i>sidC</i> <sub>Llo</sub><br>(re), <i>Pst</i> I    |
| oSD07 | TTTTCATATGATGAGAGTCACTAAAATGCCTAAAGAC           | 5' flanking sequence <i>sidC</i> <sub>Llo</sub><br>(fo), <i>Nde</i> I    |
| oSD08 | TTTTGCTAGCTTAAGTACGTGAATTAAGTACGTCC             | 3' flanking sequence <i>sidC</i> <sub>Llo</sub><br>(re), <i>Nhe</i> I    |
| oSD16 | TTTTGGGATCCATGAGAGTCACTAAAATGCTTAAAGAC          | 5' of <i>sidC</i> <sub>Llo1-340</sub> (fo)                               |
| oSD17 | TTTTTGTCGACTCATCCAGTGATTTTTTCTACGTC             | 3' of <i>sidC</i> <sub>Llo1-340</sub> (re)                               |
| oSD18 | TTTTGGGATCCGCTGCTGTTATTTCTGGG                   | 5' of <i>sidC</i> <sub>Llo609-782</sub> (fo)                             |
| oSD19 | TTTTTGTCGACTCATTATTGAAAAGTTAAGCGCTG             | 3' of <i>sidC</i> <sub>Llo609-782</sub> (re)                             |
| oSD22 | GAAAATAATATCAAGGCATGGTCCACTGATCTTGAAGC<br>AATCG | Quick Change <i>sidC</i> <sub>Llo</sub><br>( $\Delta$ <i>Sal</i> I) (fo) |
| oSD23 | CGATTGCTTCAAGATCAGTGGACCATGCCTTGATATTA<br>TTTTC | Quick Change <i>sidC</i> <sub>Llo</sub><br>( $\Delta$ <i>Sal</i> I) (re) |
| oSD24 | AAACGCGGATCCGATGAATCACAGCAAAGGAAGC              | 5' of <i>sidC</i> <sub>Llo341-608</sub> (fo)                             |

|       |                                                        |                                                                           |
|-------|--------------------------------------------------------|---------------------------------------------------------------------------|
| oSD25 | AAACGCGT <u>CGACT</u> CAATTTTCTCTATTCACGTTTGCTGG<br>AG | 3' of <i>sidC</i> <sub>L10341-608</sub> (re)                              |
| oSD26 | AAACGCGGAT <u>CCT</u> TGTCTTTACATGAGGTGCTTAAAGT<br>AGC | 5' of <i>sidC</i> <sub>L10783-969</sub> (fo)                              |
| oSD27 | AAACGCGT <u>CGACT</u> TAAAGTACGTGAATTAAGTACGTC<br>C    | 3' of <i>sidC</i> <sub>L10783-969</sub> (re)                              |
| oSD28 | GATGAGTTCTTTTTGATGGACCCCAATAGAAAAGG                    | Quick Change <i>sidC</i> <sub>L10</sub><br>( $\Delta$ <i>Bam</i> HI) (fo) |
| oSD29 | CCTTTTCTATTGGGGTCCATCAAAAAGAACTCATC                    | Quick Change <i>sidC</i> <sub>L10</sub><br>( $\Delta$ <i>Bam</i> HI) (re) |

---

<sup>a</sup> Restriction sites are underlined.
